# Supplementary material
Source: Research Square preprint supplement (doi:10.21203/rs.3.rs-9244475/v1)
Supplement: Supplementary file 1 [file 425a19154fb65a5b230018c8.docx]

Table 1. Temperature and rainfall data of Sinana Agricultural Research Center

| Average monthly temperature and rainfall for the 2022 | | | | Average monthly temperature and rainfall for the 2023 | | |
| --- | --- | --- | --- | --- | --- | --- |
| Month | Temperature (0C) | | Total Rainfall(mm) | Temperature (0C) | | Total Rainfall(mm) |
|  | Maximum | Minimum | Maximum | Minimum |
| January | 22.7 | 8.4 | 4 | 22.4 | 7.8 | 10 |
| February | 24.1 | 9.7 | 3 | 23.9 | 9.3 | 1 |
| March | 24.1 | 10.5 | 19 | 21.2 | 10.7 | 167 |
| April | 21.7 | 11 | 134 | 20.4 | 10.1 | 162 |
| May | 22.4 | 10.7 | 27 | 20.3 | 11 | 101 |
| June | 21.8 | 11 | 27 | 21.3 | 11.5 | 19 |
| July | 19.3 | 11 | 172 | 21.2 | 11.9 | 91 |
| August | 19.3 | 10.8 | 179 | 20.3 | 11 | 82 |
| September | 19.7 | 10.7 | 92 | 20.9 | 11.6 | 147 |
| October | 18.7 | 9.6 | 181 | 19.4 | 10.5 | 147 |
| November | 19.6 | 7.6 | 21 | 18.8 | 8.9 | 116 |
| December | 21.4 | 7.7 | 2 | 21.3 | 7.9 | 2 |
| Mean | 21.23 | 9.89 | 72 | 20.95 | 10.2 | 87 |
| Total |  |  | **861** |  |  | **1,045** |

Table 2. Average daily temperature of the laboratory during 2024 antibiosis test at Sinana Agricultural Research Center

| Date | Month | Date | Month |
| --- | --- | --- | --- |
| October | October |
| 1 | 21.02 | 17 | 20.02 |
| 2 | 20.68 | 18 | 26.35 |
| 3 | 21.02 | 19 | 22.02 |
| 4 | 21.35 | 20 | 24.35 |
| 5 | 21.02 | 21 | 19.02 |
| 6 | 21.68 | 22 | 20.02 |
| 7 | 20.35 | 23 | 20.35 |
| 8 | 19.35 | 24 | 21.35 |
| 9 | 22.68 | 25 | 23.35 |
| 10 | 23.02 | 26 | 20.02 |
| 11 | 21.68 | 27 | 21.35 |
| 12 | 22.68 | 28 | 22.02 |
| 13 | 23.02 | 29 | 21.35 |
| 14 | 20.35 | 30 | 18.35 |
| 15 | 20.02 | 31 | 22.02 |
| 16 | 20.35 |  |  |
| Mean |  |  | **21.36** |
